# Supplementary material for: Thrombospondin-2 acts as a bridge between tumor extracellular matrix and immune infiltration in pancreatic and stomach adenocarcinomas: an integrative pan-cancer analysis
Source: Springer Nature journal article supplement (doi:10.1186/s12935-022-02622-x), 2022-06-14

Figure 12a Original Images for Western blot

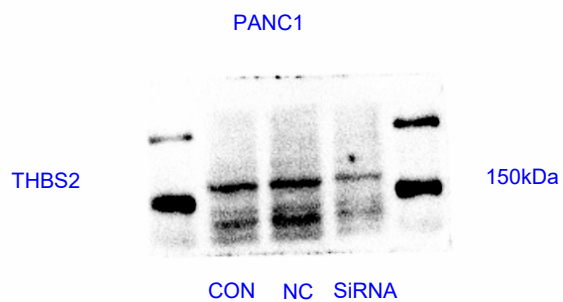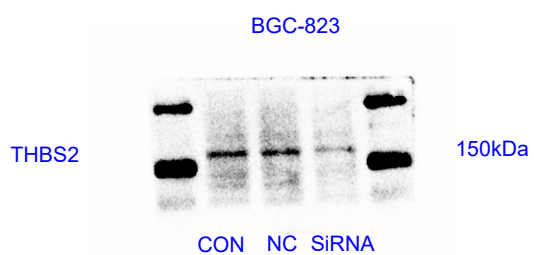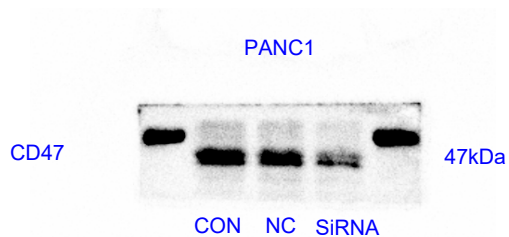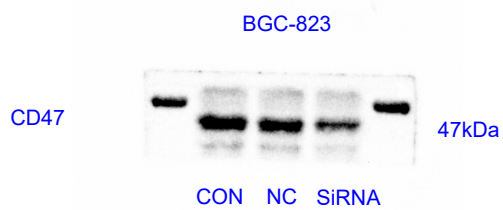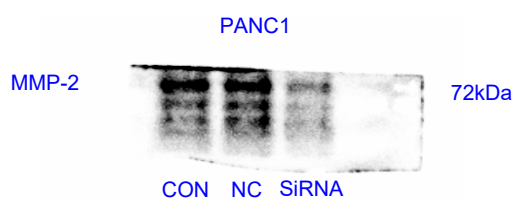

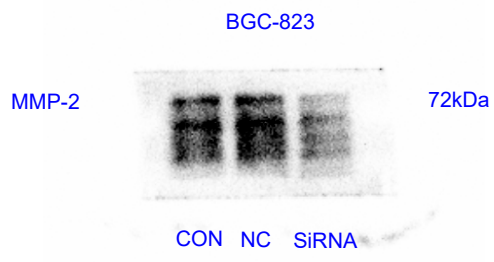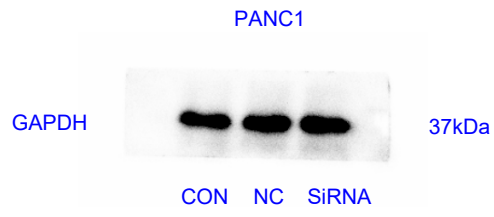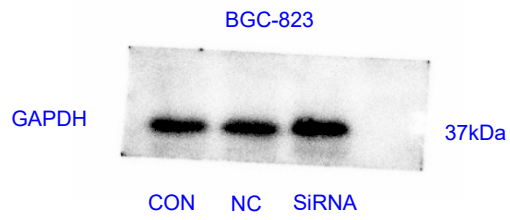

Supplement: MOESM1 [file 12935_2022_2622_MOESM1_ESM.pdf]
